# Supplementary material for: Geographic Atrophy: Confocal Scanning Laser Ophthalmoscopy, Histology, and Inflammation in the Region of Expanding Lesions
Source: PubMed Central journal article supplement — Invest Ophthalmol Vis Sci. 2020 Jul 13;61(8):15. doi: 10.1167/iovs.61.8.15 (PMC7425718; doi:10.1167/iovs.61.8.15), 2020-07-13
Supplement: iovs-61-8-15_s002.pdf [file iovs-61-8-15_s002.pdf]

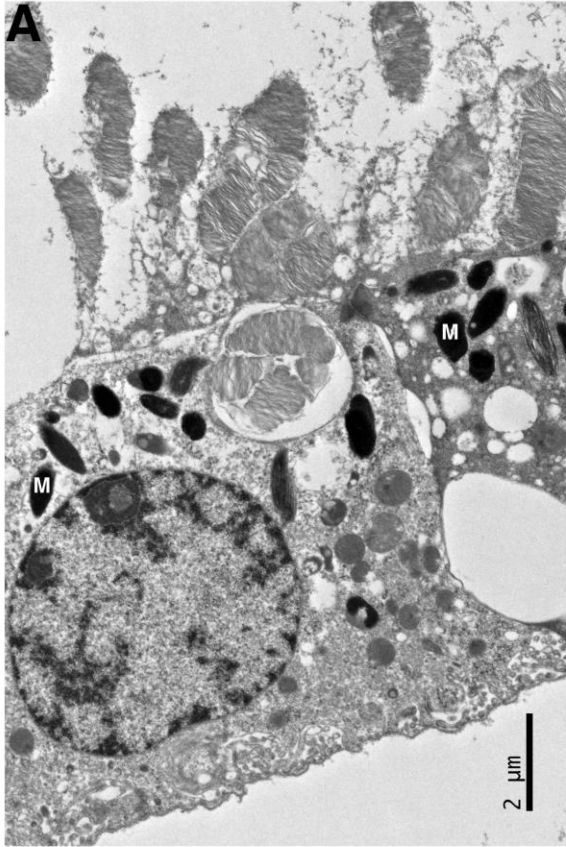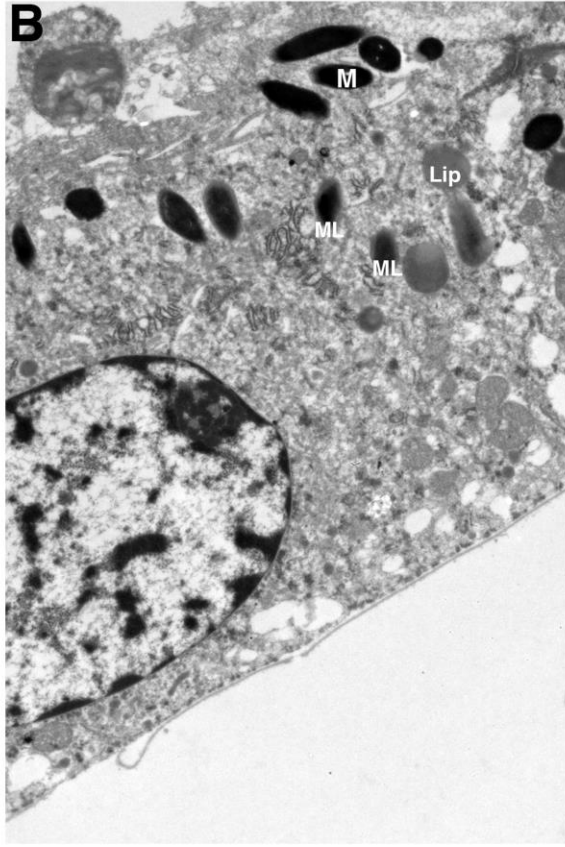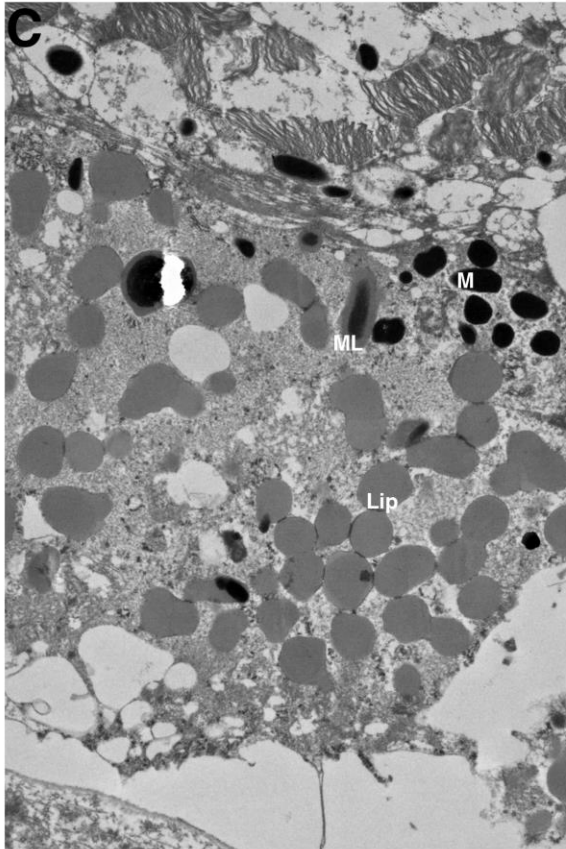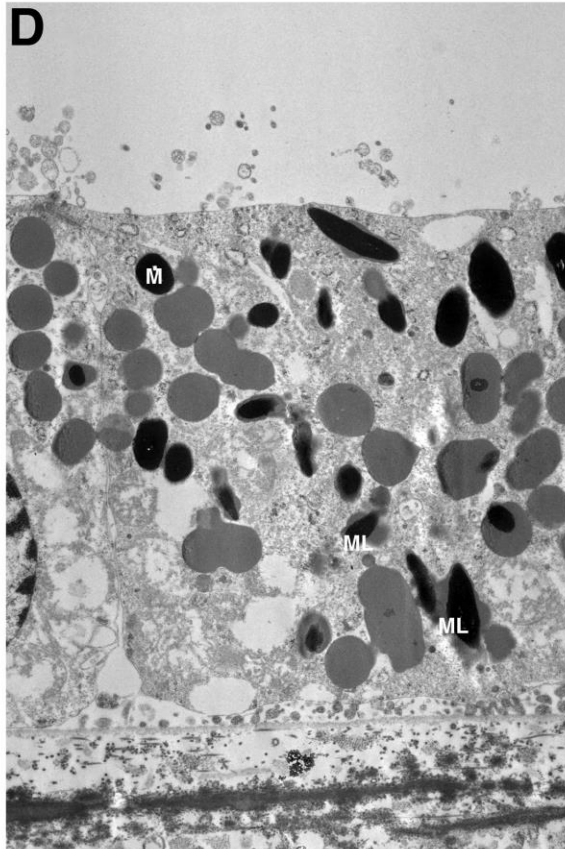

**Supplementary Figure 2. Ultrastructure of RPE granules from different age groups.** Electron microscopy of a 38 week-old fetal RPE (A), a 3 year-old (B), a 72 year-old control (C) and AMD donor RPE outside of the GA area (D). The 38 week-old fetal RPE displayed mature melanin granule (M) and an early stage melanosome (asterisk). The 3 year-old RPE displayed melanin, lipofuscin (Lip), and melanolipofuscin (ML) granules. Both the 72 year-old control and AMD donor RPE outside of the GA area displayed an increased number of lipofuscin granules in their cytoplasm. This analysis did not allow the differentiation of the granules within the different age groups.
