# Supplementary material for: Geographic Atrophy: Confocal Scanning Laser Ophthalmoscopy, Histology, and Inflammation in the Region of Expanding Lesions
Source: PubMed Central journal article supplement — Invest Ophthalmol Vis Sci. 2020 Jul 13;61(8):15. doi: 10.1167/iovs.61.8.15 (PMC7425718; doi:10.1167/iovs.61.8.15), 2020-07-13
Supplement: iovs-61-8-15_s004.pdf [file iovs-61-8-15_s004.pdf]

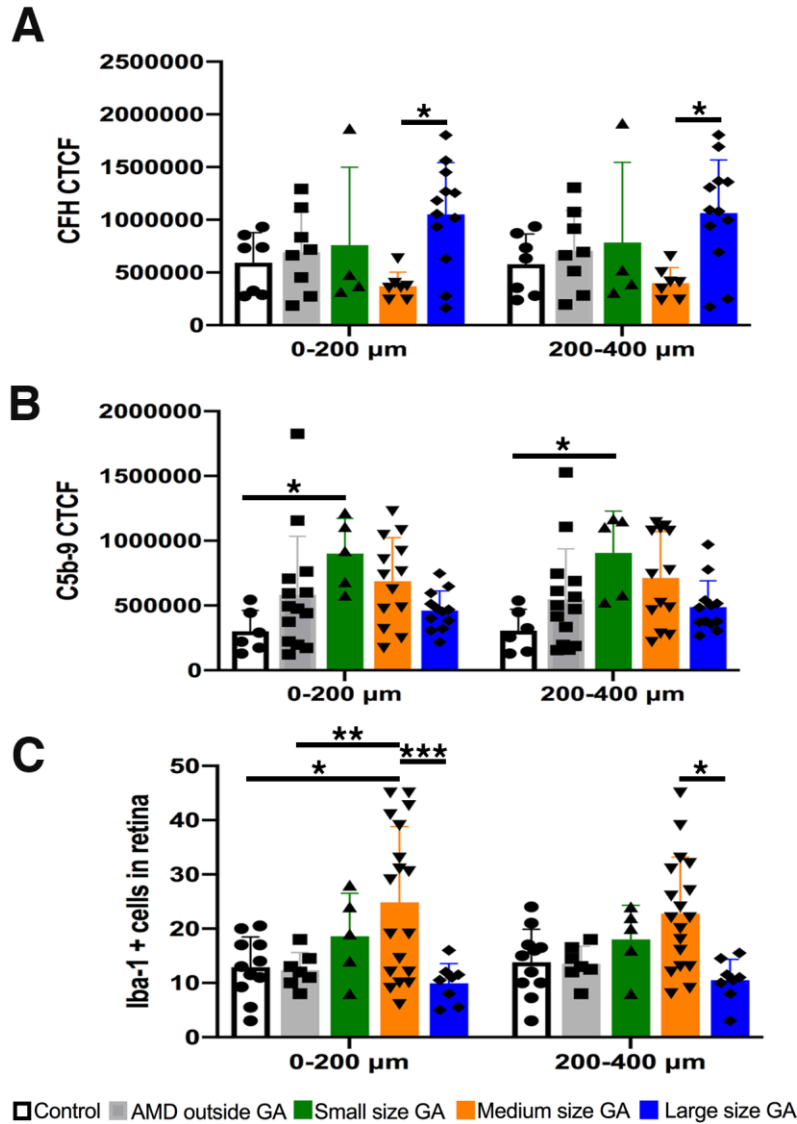

**Supplementary Figure 4. Quantification of the inflammation markers in retinal sections in the GA borders and outside it in donors with AMD.** The frequency of the presence of Iba-1+ cells within 0-200 and 200-400mm of the border of the GA atrophies of AMD donors was quantified. Significant increase of Iba-1 cells in the medium size GA and decrease in the large size GA was detected within 200 μm of the border ( $p=0.0043$ ,  $p=0.0136$ , and  $p=0.0009$  between control and AMD outside GA and the medium size GA, and medium size GA and large size GA, respectively). The immunofluorescence intensity of CFH deposition within 0-200 and 200-400 μm of the border of the GA atrophies of AMD donors displayed significant increase between medium size and large size GA within 400 μm of the GA border ( $p=0.0119$

and 0.0148, respectively). Significant increase in C5b-9 deposition was observed between the control and small size GA ( $p=0.0214$  and  $p=0.0217$ , respectively).
